# Supplementary material
Source: PubMed Central journal article supplement (PMC5085268)

# Supplemental Figure-1

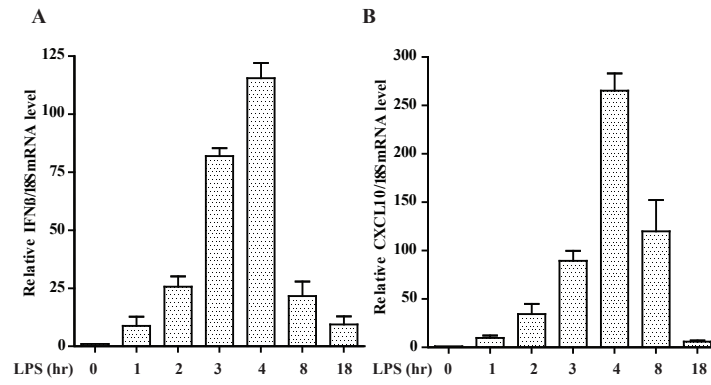

## Supplemental Figure-2

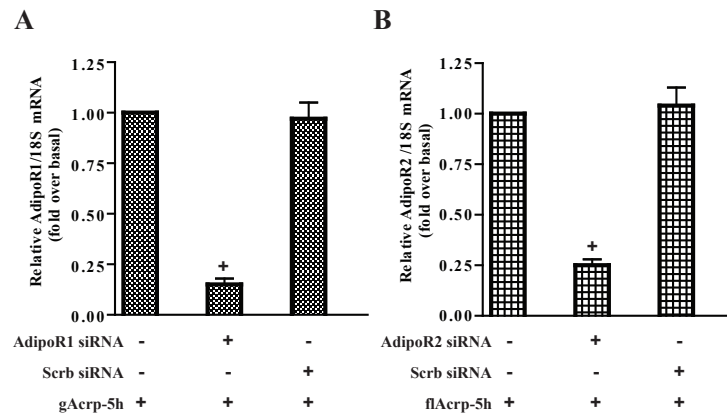

### Supplemental Figure-3

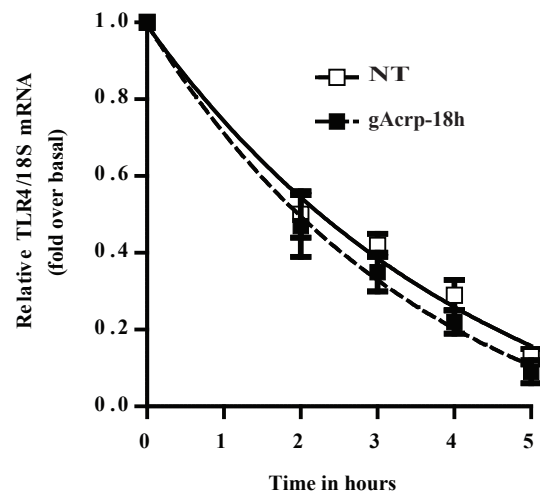

## Supplemental Figure- 4

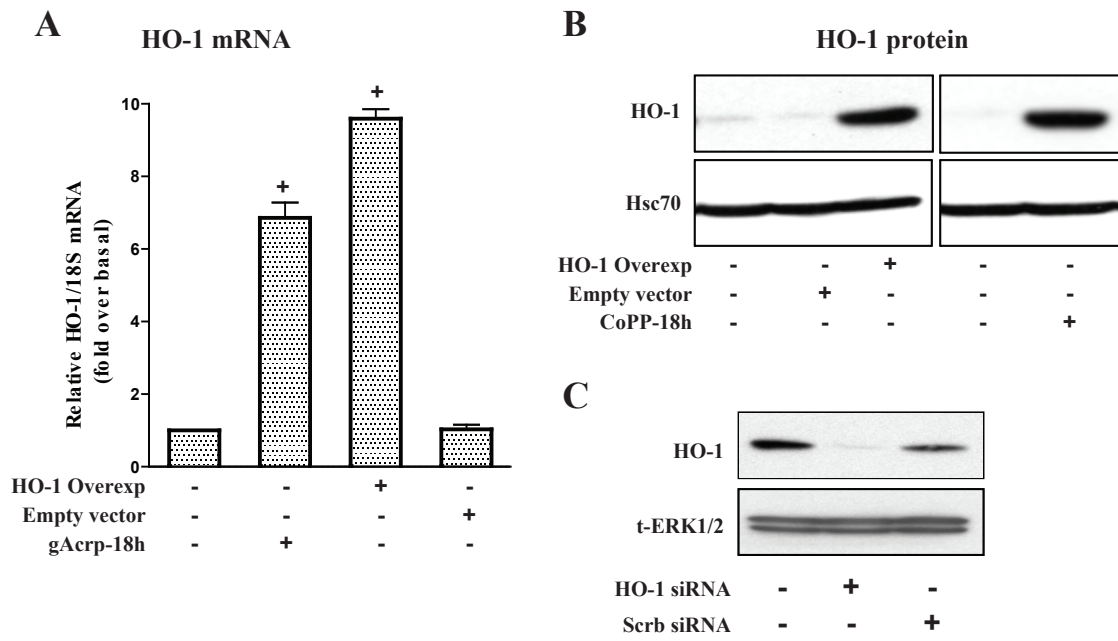

Supplement: NIHMS820735-supplement-Figures.pdf [file NIHMS820735-supplement-Figures.pdf]
